# Supplementary material
Source: Springer Nature journal article supplement (https://www.springermedizin.de/resource/supplementary/12911_2009_312_MOESM2_ESM.pdf/9525452)
Supplement: MOESM2 [file 9525452]

DIAGNOSER og JOURNALTEKST for Dr. Helge Helgesen og pasient Bassøe, Carl-Fredrik f. 05.08.1947, Diagnose: Diabetes ikke-insulinavhengig

NYTT PROBLEM SAMME PROBLEM HOVED-til BIDIAGNOSE KRONOLOGISK INVERS BESYME LABORATORIUM LAB GRAFIKK KORRIGER FASTE TEKSTER FRASER FLYNN  
 STORT KLADDEFELT STORT VISEFELT NORMALT STORE TEKSTFELTER IJLBAKE

 KARTOTEK  PERSONALIA  JOURNAL  AVTALEBOK  TAKST  SM  RESEPT  RESYME/UTSKRIFT  LAB / US  LABSVAR  
 UTSKRIFT  LAGRE  AVSLUTT  AVRYT  INFORMASJON  SKIFT BRUKER  DIAGNOSER

Sepsis IKA  
 Diabetes ikke-insulinavhengig

Sepsis IKA  
 Pyelonefrit akutt  
 Cystitt akutt

Journaltekst for sepsis ika. Pasienten har bare et problem, og vært til 3 konsultasjoner.

**CAVE:**

SAVE AS SAME PROBLEM

05.01.2008: The patient is febrile, hypotension and tachycardiac. Immediate hospitalization.

03.01.2008: The patient was treated with antibiotics. From yesterday acute pain in the lumbar region. Still no fever or chills. Afebrile. Clinical examination without signs of disease. Normal blood pressure and pulse. Urine loaded with neutrophils. Change of antibiotic. Expectaion. Patient returns on the least suspicion of fever, dizziness og chills.

27.12.2007: From yesterday acute pain on voiding urine. No fever or chills. Afebrile. Clinical examination without signs of disease. Normal blood pressure and pulse.

XXXXXXXXXXXX
